# Supplementary material for: Ceramide Nanoliposomes as Potential Therapeutic Reagents for Asthma
Source: MDPI journal article supplement (doi:10.3390/cells12040591), 2023-02-11
Supplement: s1 [file s1]

## Supplementary Figure 1

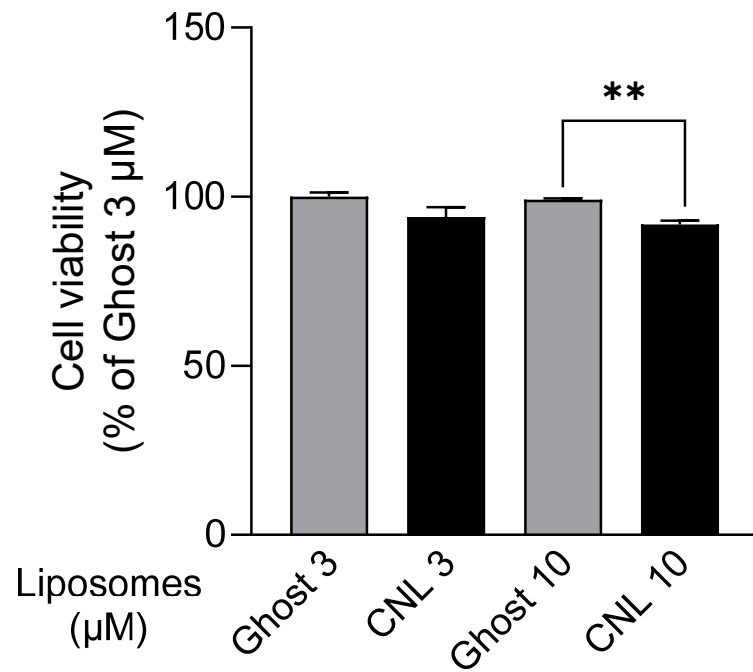

### Effects of CNL on cell viability in human lung epithelial A549 cells

A549 cells plated in 6-well plates were treated with 3 or 10 μM Ghost or CNL for 24 h and then cell death was determined by trypan blue viability assay. Cells were suspended in PBS. A 1:1 dilution of the cell suspension was made using 0.4% trypan blue and loaded into a hemocytometer. Cell viability was immediately assessed. The data represent mean  $\pm$  S.E. of three values. \*\*  $p < 0.01$  compared to the Ghost 10 μM group.

## Supplementary Figure 2

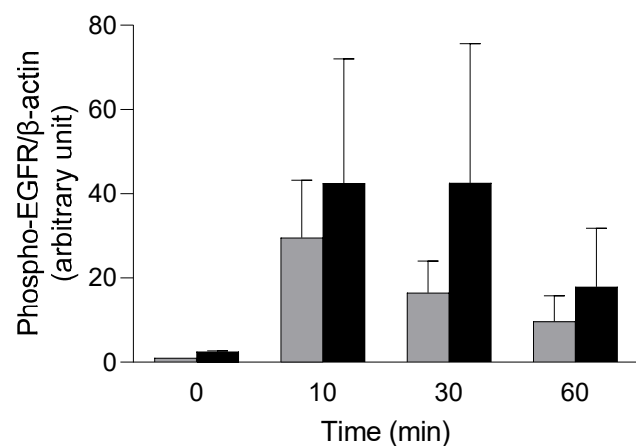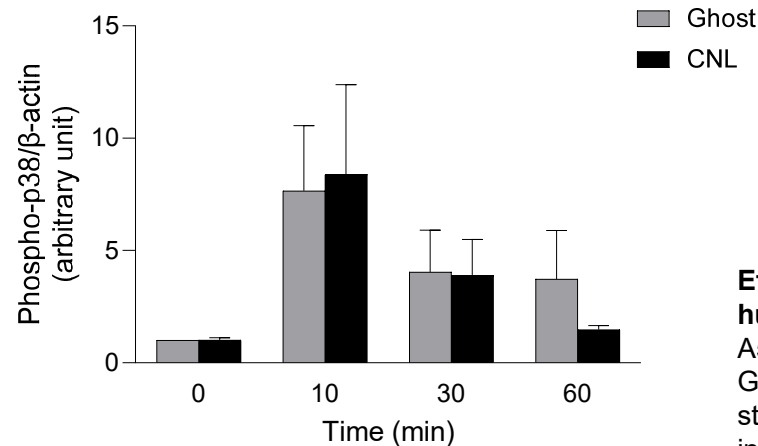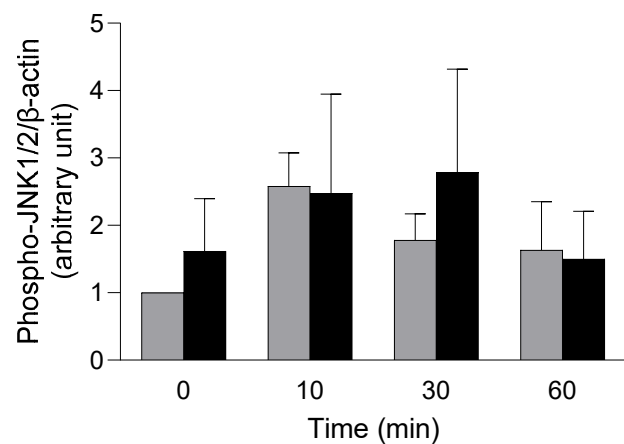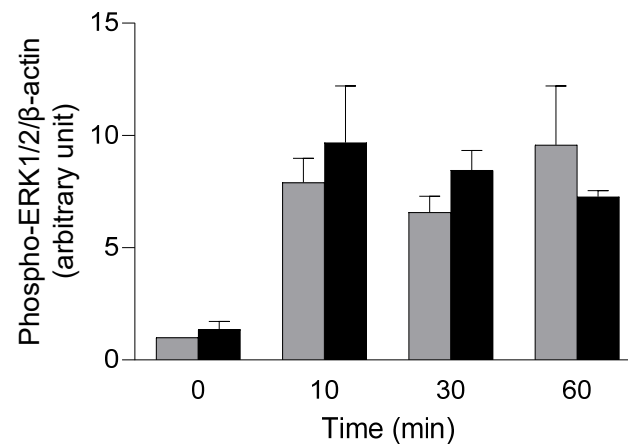

### Effects of CNL on EGF signaling in human lung epithelial A549 cells

A549 cells were treated with 10  $\mu$ M Ghost or CNL for 6 h followed by stimulation with 100 ng/ml EGF for the indicated periods. Proteins were subjected to immunoblot analysis. Intensity of the immunoblots were quantified and normalized with  $\beta$ -actin. The values are shown as percentages relative to Ghost 0 min group. Data are shown as mean  $\pm$  S.E. (n=3).
